# Supplementary material for: Two-dimensional transitional metal dihydride crystals with anisotropic and spin-polarized Fermi Dirac cones
Source: Royal Society of Chemistry journal article supplement (doi:10.1039/c8tc03489c), 2018-01-01
Supplement: c8tc03489c1.pdf [file c8tc03489c1.pdf]

Supporting Information for

**Two-dimensional transitional metal dihydrides crystals with  
anisotropic and spin-polarized Fermi Dirac cone**

Haifeng Lv,<sup>§</sup> Daoxiong Wu,<sup>§</sup> Xiuling Li,<sup>#</sup> Xiaojun Wu,<sup>\*</sup> and Jinlong Yang

Hefei National Laboratory of Physical Sciences at the Microscale, School of Chemistry and Materials Sciences, CAS Key Laboratory of Materials for Energy Conversion, and CAS Center for Excellence in Nanoscience, University of Science and Technology of China, Hefei, Anhui 230026, China

Synergetic Innovation of Quantum Information & Quantum Technology, University of Science and Technology of China, Hefei, Anhui 230026, China.

\* Corresponding author E-mail: xjwu@ustc.edu.cn

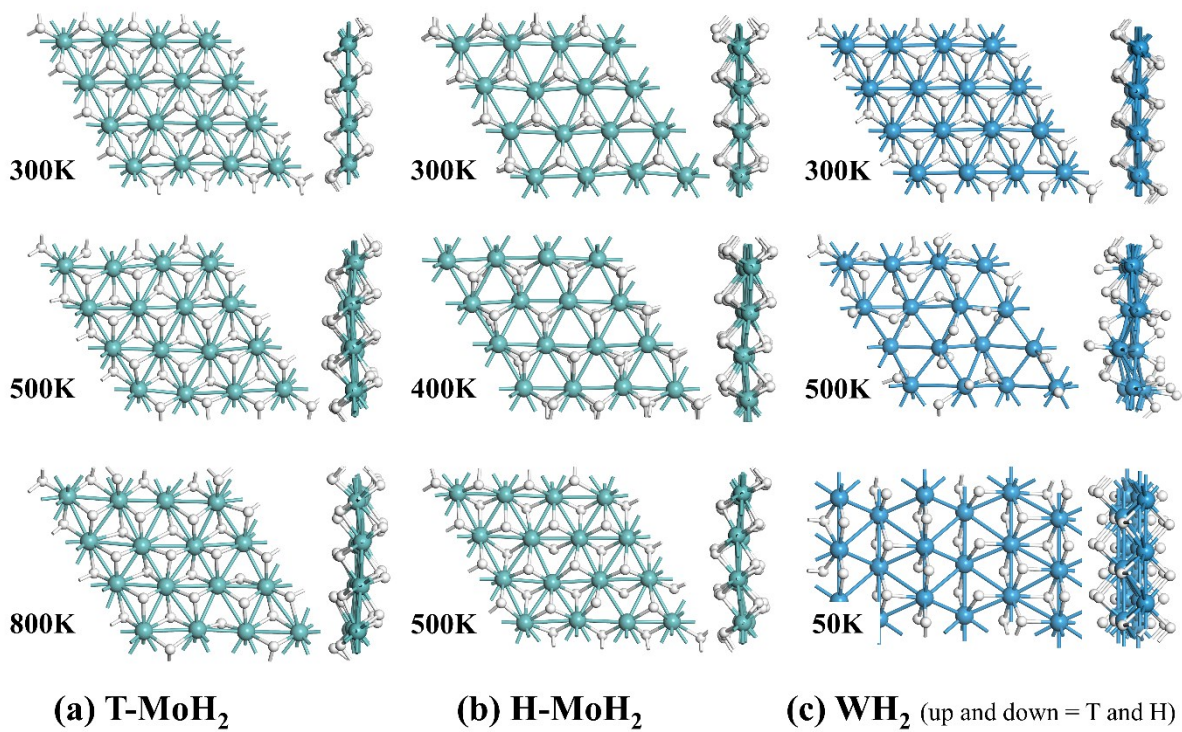

**Figure S1.** The structural snapshots of Born-Oppenheimer Molecular Dynamic simulations for (a) T-MoH<sub>2</sub>, (b) H-MoH<sub>2</sub>, (c) WH<sub>2</sub> (up and down = T and H) nanosheets, respectively.

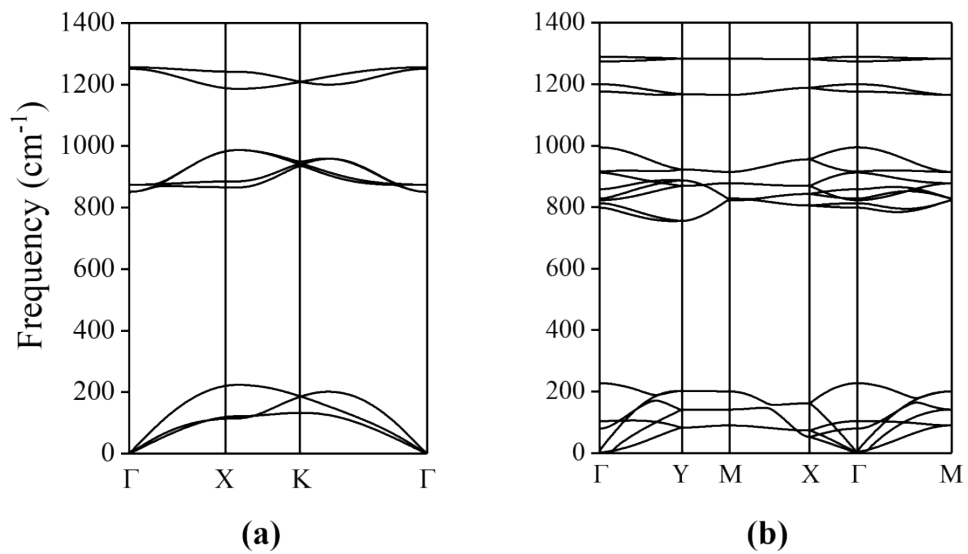

**Figure S2.** The phonon dispersion spectra of 2D (a)T-WH<sub>2</sub> and (b)H-WH<sub>2</sub>.

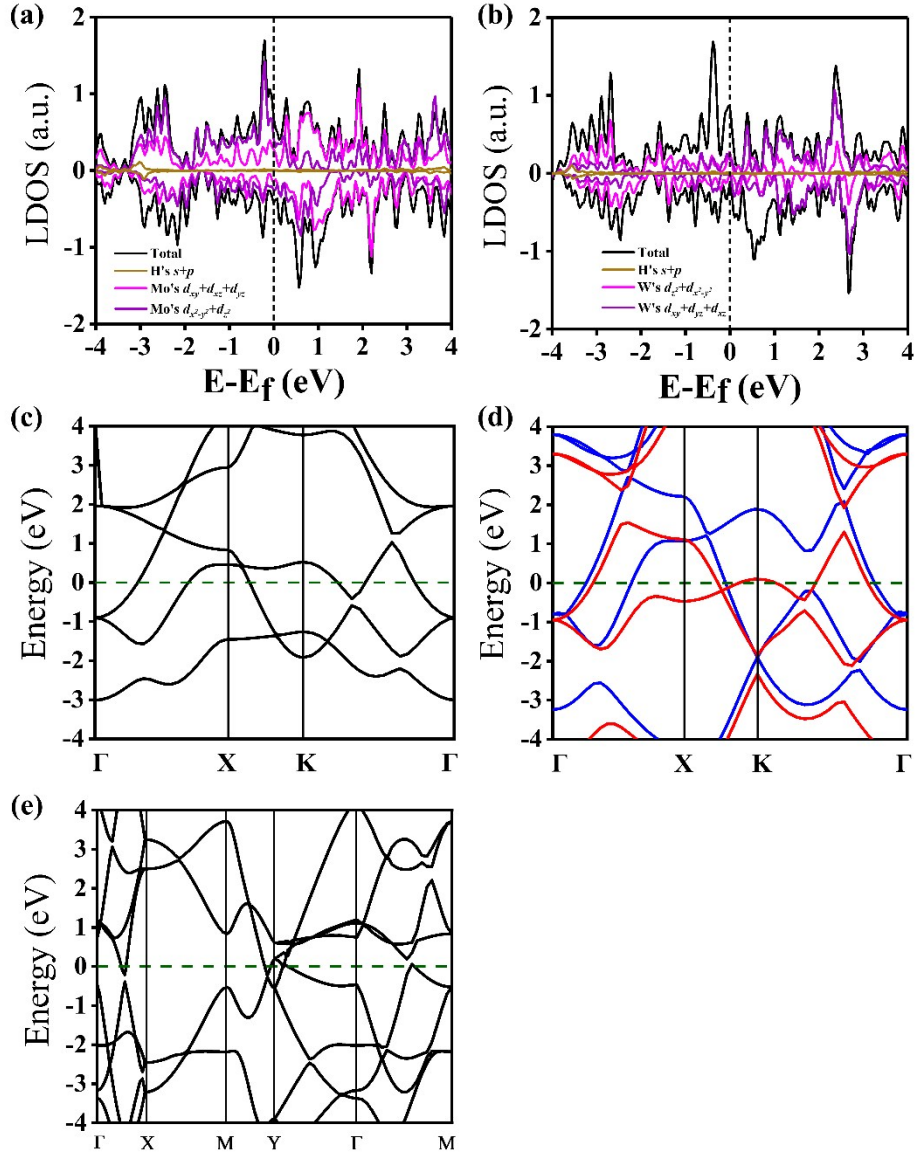

**Figure S3.** The partial DOS projected on atomic orbitals of 2D (a) T-MoH<sub>2</sub>, (b) T-WH<sub>2</sub>, band structure of (c) H-MoH<sub>2</sub>, (d) T-WH<sub>2</sub> and (e) H-WH<sub>2</sub>. The fermi level is set as 0 eV.

**Table S1. The energy difference between unit-cell of T-MH<sub>2</sub> and H-MH<sub>2</sub> in ground state in eV per unit cell.**

| system     | T-MoH <sub>2</sub> | H-MoH <sub>2</sub> | T-WH <sub>2</sub> | H-WH <sub>2</sub> |
|------------|--------------------|--------------------|-------------------|-------------------|
| $\Delta E$ | 0.000              | 0.455              | 0.000             | 0.364             |

**Table S2. The calculated metal-hydrogen (M-H) bond strength of 2D MH<sub>2</sub> in eV per M-H bond.**

| system   | T-MoH <sub>2</sub> | H-MoH <sub>2</sub> | T-WH <sub>2</sub> | H-WH <sub>2</sub> |
|----------|--------------------|--------------------|-------------------|-------------------|
| $E_{BS}$ | 1.800              | 1.691              | 1.600             | 1.521             |

**Table S3. The energy difference between FM, NM and AFM states of unit-cell of 2D MH<sub>2</sub> monolayers in ground state in eV per metal atom.**

| system           |   | $E_{FM}$ | $E_{AFM}$ | $E_{NM}$ |
|------------------|---|----------|-----------|----------|
| MoH <sub>2</sub> | T | 0.000    | 0.038     | 0.248    |
|                  | H | /        | /         | /        |
| WH <sub>2</sub>  | T | 0.000    | 0.114     | 0.201    |
|                  | H | 0.110    | 0.000     | 0.247    |
